# Supplementary material for: The Impact of Serum Glucose on the Predictive Value of Serum Lactate for Hospital Mortality in Critically Ill Surgical Patients
Source: Hindawi journal article supplement (doi:10.1155/2019/1578502), 2019-11-26
Supplement: f1 [file 1578502.f1.pdf]

**Table S1 Patient number of 6 subgroups**

|            | Lactate (mmol/L) | Glucose (mmol/L) | Number of patient |
|------------|------------------|------------------|-------------------|
| Subgroup 1 | <1.45            | <7               | 103               |
| Subgroup 2 | <1.45            | >=7&<=9          | 41                |
| Subgroup 3 | <1.45            | >9               | 55                |
| Subgroup 4 | >1.45            | <7               | 45                |
| Subgroup 5 | >1.45            | >=7&<=9          | 17                |
| Subgroup 6 | >1.45            | >9               | 32                |
